# Supplementary material for: Progenitor death drives retinal dysplasia and neuronal degeneration in a mouse model of ATRIP-Seckel syndrome
Source: Dis Model Mech. 2020 Oct 30;13(10):dmm045807. doi: 10.1242/dmm.045807 (PMC7648607; doi:10.1242/dmm.045807)
Supplement: Supplementary information [file dmm-13-045807-s1.pdf]

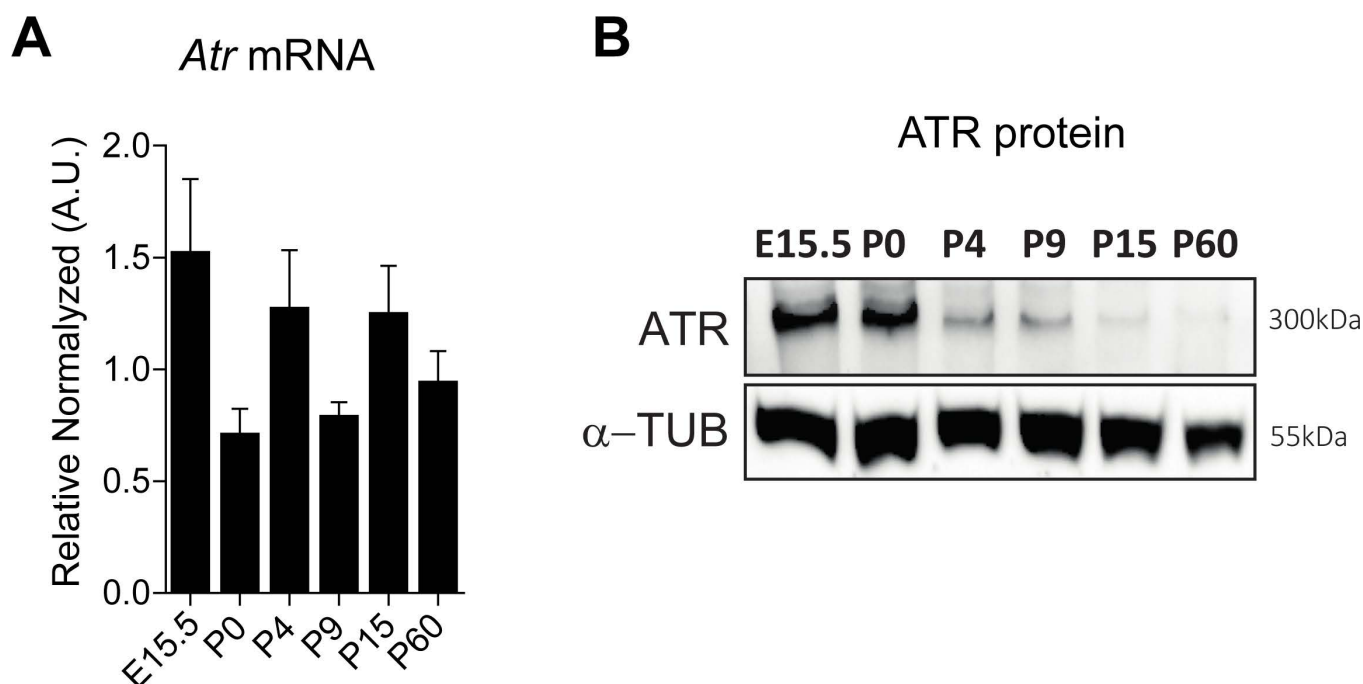

**Fig. S1. *Atr* expression pattern during retinal development.** (A) Real-time RT-PCR

for *Atr*. TaqMan probes for *Gpi1* and *Actb* were used as loading controls (n=3).

(B) Western blot analysis of the ATR protein content in the E15.5, P0, P4, P9, P15

and P60 mouse retinas. Various commercial antibodies were tested (NB100-359,

Bioworld BS1510, LSBIO C117796, ATRIP F-7 sc-365383, ThermoFisher PA1-519 and

Cell signaling technologies #2737) to examine endogenous levels of ATRIP protein

during retinogenesis by western blot. Either endogenous mouse ATRIP protein was not

detectable or the detected ~85kD band was unspecific.

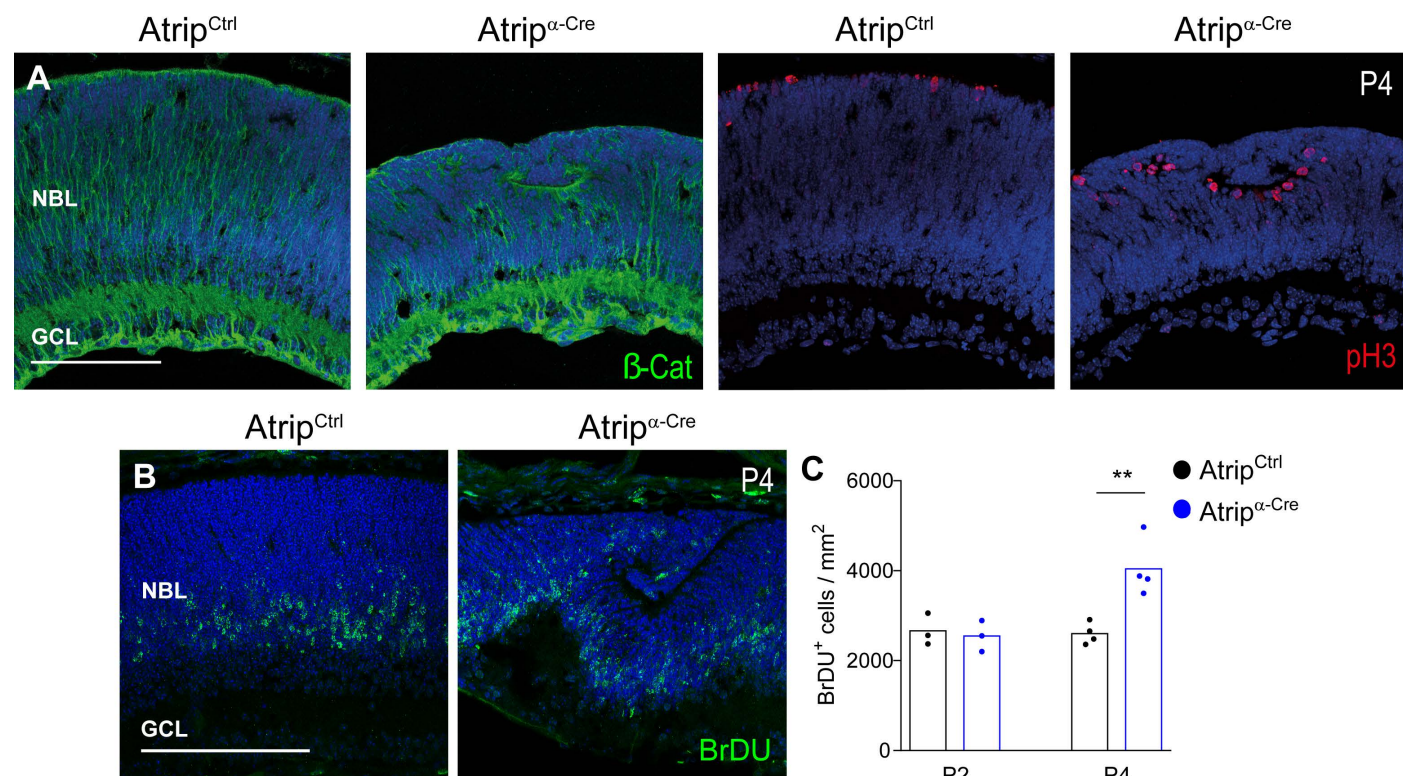

**Fig. S2. Inactivation of *Atrip* leads to postnatal apical-basal polarity defects and proliferation defects.** (A) Representative confocal images of the *Atrip*<sup>Ctrl</sup> and *Atrip*<sup>α-Cre</sup> retinas double stained for β-catenin (β-cat) and pH3 at P4. (B) Representative images and quantitative analysis of BrDU positive cells per mm<sup>2</sup> at P2 and P4 in the *Atrip*<sup>Ctrl</sup> and *Atrip*<sup>α-Cre</sup> retinas. Scale bar: 100 μm. NBL: Neuroblastic layer.

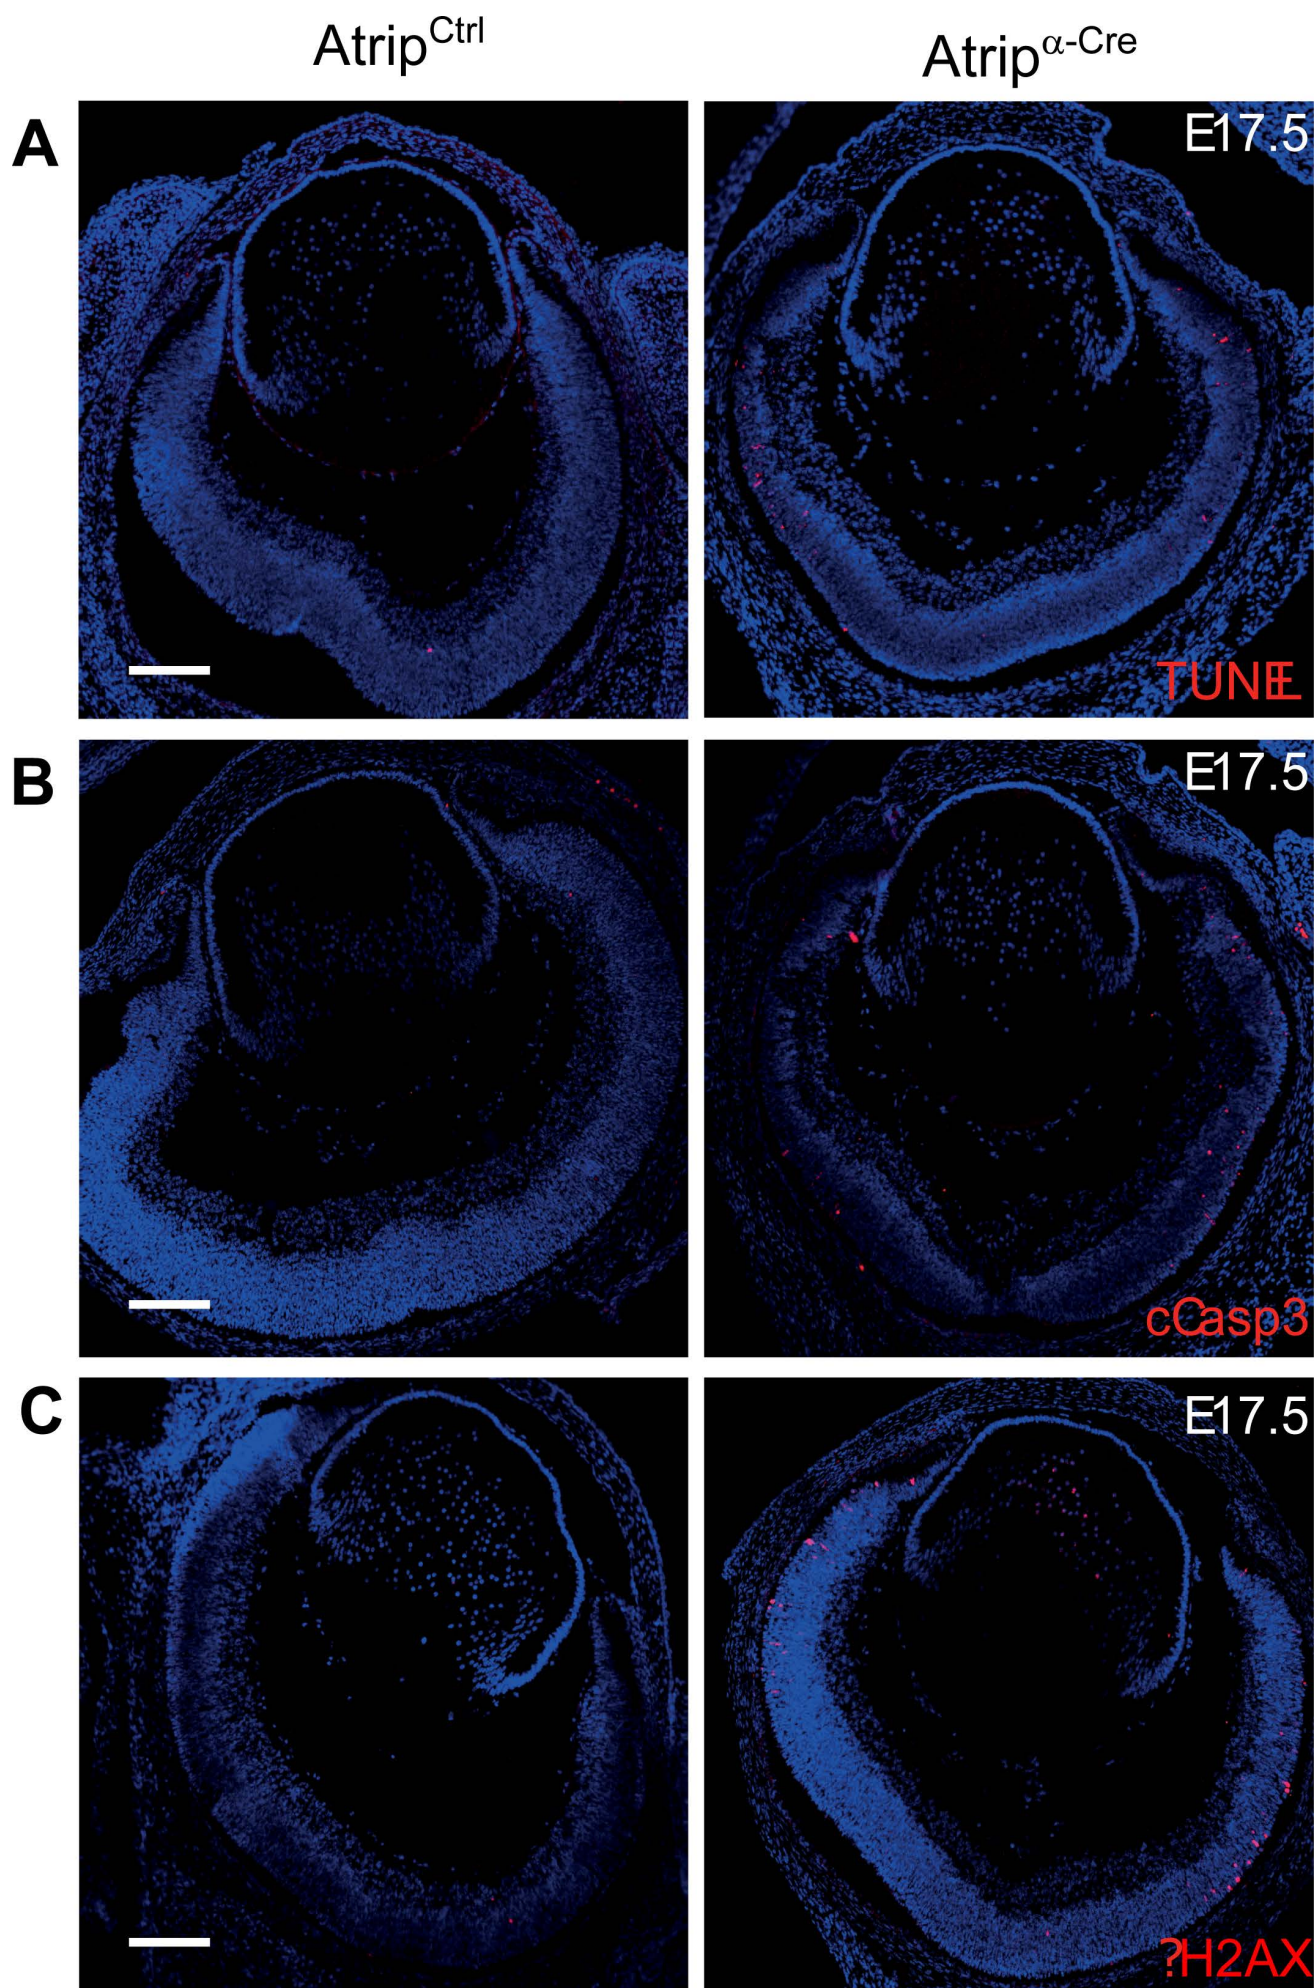

**Fig. S3. *Atrip*<sup>*α-Cre*</sup> retinas show apoptotic cell death and DNA damage in the retinal periphery. (A-C) TUNEL assay (A), cCasp3 immunofluorescence (B) and γH2AX immunofluorescence (C) representative confocal images from eye cryosections in *Atrip*<sup>*Ctrl*</sup> and *Atrip*<sup>*α-Cre*</sup> samples at E17.5. Scale bar: 100μm.**
